# Supplementary material for: Regulation of Small RNAs and Corresponding Targets in Nod Factor-Induced Phaseolus vulgaris Root Hair Cells
Source: MDPI journal article supplement (doi:10.3390/ijms17060887), 2016-06-04
Supplement: s1 [file s1]

## Supplementary Materials: Regulation of Small RNAs and Corresponding Targets in Nod Factor-Induced *Phaseolus vulgaris* Root Hair Cells

Damien Formey, José Ángel Martín-Rodríguez, Alfonso Leija, Olivia Santana, Carmen Quinto, Luis Cárdenas and Georgina Hernández

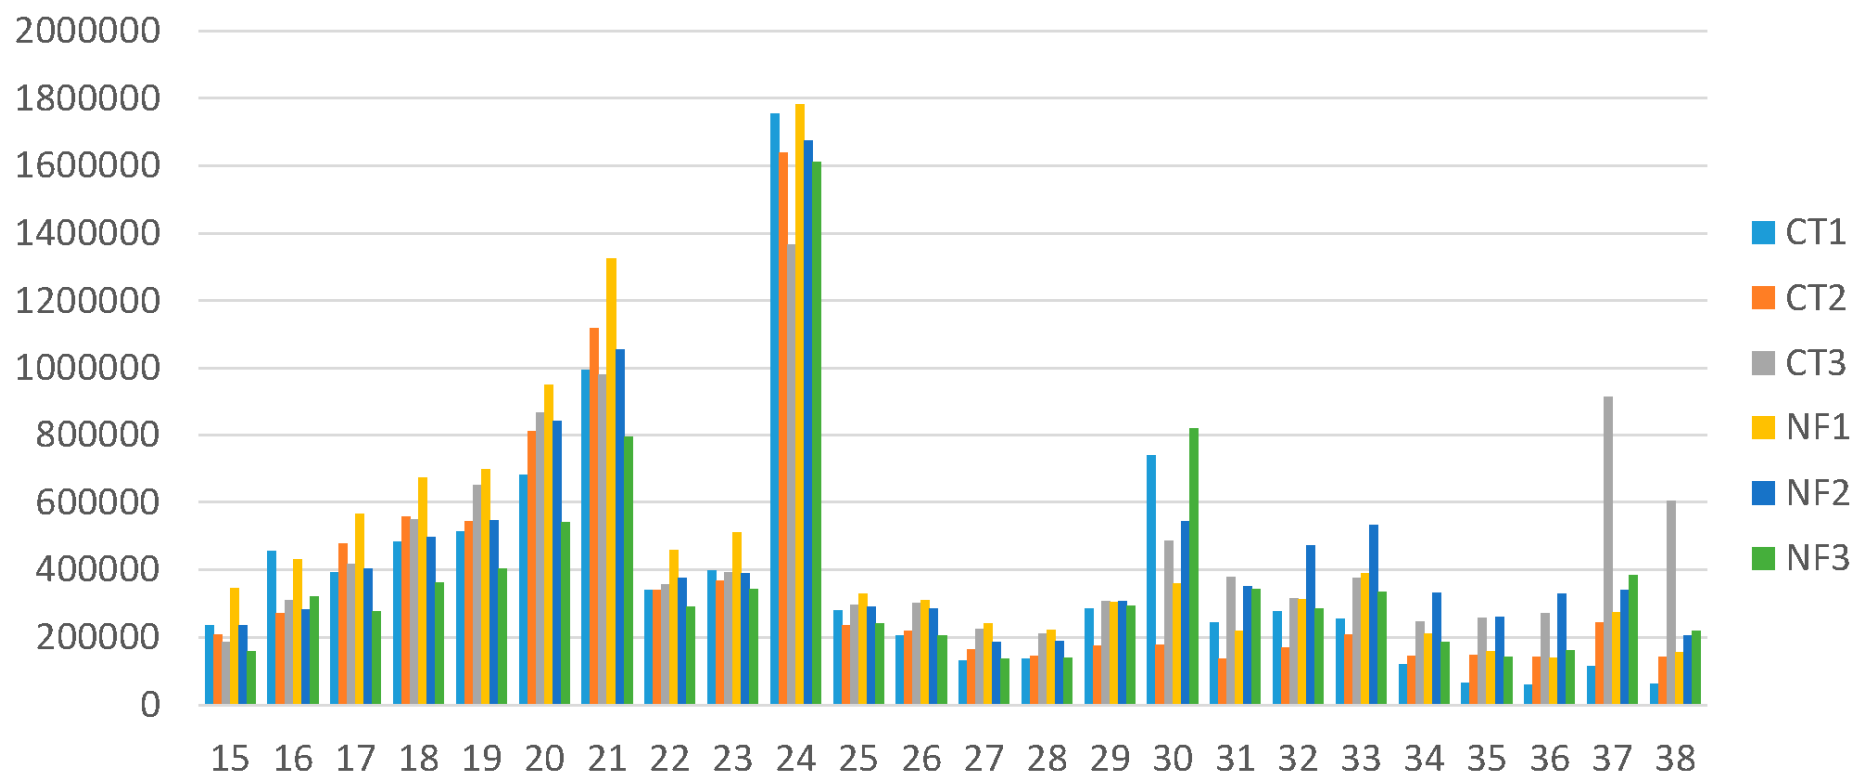

**Figure S1.** Size distribution of the sequencing reads of each library. X axis represents the read sizes (nt) and the Y axis represents the number of reads for each read size. The 6 histograms represent the 6 libraries sequences.
